# Racial, Economic and Health Inequality and COVID-19 Infection in the United States

**Running Title:** Socioeconomic Disparity and COVID-19

Vida Abedi<sup>a,d,#</sup>, Oluwaseyi Olulana<sup>c,#</sup>, Venkatesh Avula<sup>a</sup>, Durgesh Chaudhary<sup>b</sup>, Ayesha Khan<sup>b</sup>, Shima Shahjouei<sup>b</sup>, Jiang Li<sup>a,&</sup>, Ramin Zand<sup>b,&,\$</sup>

<sup>a</sup> Department of Molecular and Functional Genomics, Weis Center for Research, Geisinger Health System, Danville, PA, United States.

<sup>b</sup> Geisinger Neuroscience Institute, Geisinger Health System, Danville, PA, United States.

<sup>c</sup> Geisinger Commonwealth School of Medicine, Scranton, PA, United States

<sup>d</sup> Biocomplexity Institute, Virginia Tech, Blacksburg, VA, United States.

<sup>#</sup> *Contributed Equally.* <sup>&</sup> *Co-senior Authors.* <sup>\$</sup> *Corresponding Author.*

*Word Count: 2,882*

*Tables: 3 (9 tables in supplement)*

*Figures: 3 (8 figures in supplement)*

**Author's contribution:** VA and RZ designed the study. OO, VeA extracted and prepared the data for analysis. AK and DC performed data validation. JL, RZ, OO, and VA performed the analysis. JL, RZ, OO, SS and VA contributed to the interpretation of the results. VA and OO wrote the initial draft. All authors provided critical feedback and contributed to different sections of the manuscript. All authors reviewed and approved the final version of the manuscript.

**Source of Funding:** RZ and VA have funding support from the Geisinger Health Plan Quality Fund as well as the National Institute of Health R56HL116832 (sub-award) during the study period. The funders had no role in study design, data collection, and interpretation, or the decision to submit the work for publication.

**Conflict of Interest:** The authors declare no competing interests.

**Corresponding Author:**

Ramin Zand, MD, MPH

Associate Professor of Neurology and Medicine

Director, Stroke Program, Geisinger Northeast Region

100 N Academy Ave, Danville, PA 17822

Ph: 570-808-7330 | Fax: 570-808-3209 | [rzand@geisinger.edu](mailto:rzand@geisinger.edu); [ramin.zand@gmail.com](mailto:ramin.zand@gmail.com)

## Abstract

**Background:** There is preliminary evidence of racial and social-economic disparities in the population infected by and dying from COVID-19. The goal of this study is to report the associations of COVID-19 with respect to race, health and economic inequality in the United States.

**Methods:** We performed a cross-sectional study of the associations between infection and mortality rate of COVID-19 and demographic, socioeconomic and mobility variables from 369 counties (total population: 102,178,117 [median: 73,447, IQR: 30,761-256,098]) from the seven most affected states (Michigan, New York, New Jersey, Pennsylvania, California, Louisiana, Massachusetts).

**Findings:** The risk factors for infection and mortality are different. Our analysis shows that counties with more diverse demographics, higher population, education, income levels, and lower disability rates were at a higher risk of COVID-19 infection. However, counties with higher disability and poverty rates had a higher death rate. African Americans were more vulnerable to COVID-19 than other ethnic groups (1,981 African American infected cases versus 658 Whites per million). Data on mobility changes corroborate the impact of social distancing.

**Interpretation:** The observed inequality might be due to the workforce of essential services, poverty, and access to care. Counties in more urban areas are probably better equipped at providing care. The lower rate of infection, but a higher death rate in counties with higher poverty and disability could be due to lower levels of mobility, but a higher rate of comorbidities and health care access.

**Funding:** This study had no specific funding.

**Keywords:** Healthcare Disparities, Health Status Disparities, Socioeconomic Factors, COVID-19, Economic Inequality, Racial Disparity, United States, Population-Based Analysis.

## INTRODUCTION

The complexity of managing patients with the Coronavirus disease 2019 (COVID-19), a global pandemic<sup>1</sup> originated in China,<sup>2</sup> has led to the widespread implementation of preventative measures such as social distancing and mask-use<sup>3</sup> in many countries including the United States (US). As of April 14, 2020, there were over 1.9 million confirmed cases around the world with 601,000 cases and 24,129 deaths in the US alone.<sup>4</sup> It has been reported that age 65 and older, body mass index  $\geq 40$ , immunosuppression, smoking, hypertension, cardiovascular diseases are underlying conditions that increase the risk of death from COVID-19.<sup>5,6</sup>

The most recent conundrum of this disease is ascribed to the preliminary evidence of racial disparities in the population infected and dying from COVID-19.<sup>3</sup> In a recent study, the center for disease control and prevention (CDC) in the US reported data from fourteen states and suggested that the US Black population may be disproportionately affected by COVID-19.<sup>3</sup> This observation is consistent with the influenza A (H1N1) pandemic where other studies showed evidence of racial and ethnic disparities in the population affected both in exposure, severity, and mortality of the disease.<sup>7,8</sup> As states release the racial and ethnic demographic data of COVID-19 cases, in addition to the increased spread of this disease to the central states, it is imperative that we understand the patterns of infection and death to reduce the risks, especially for high-risk population, and resolve issues that impede the provision of optimal care.

In this study, we conducted a population-based analysis to explore racial and economic inequality associated with the infection rate and risk of mortality due to COVID-19 in the US. The goal of the study is to provide evidence on the association of COVID-19 with respect to race, income level, poverty, education, and the impact of preventative measures such as social distancing. We trust

that the decision making by the states' officials will be driven by data and based on their unique needs and population characteristics to help in combating this disease.

## METHODOLOGY

The study was conducted at two levels: 1) Analysis of population characteristics (44 variables) for 369 counties in seven states which had the highest rate of COVID-19 infection as of April 9<sup>th</sup>, 2020 along with COVID-19 infection and mortality rates. The included states were California, Michigan, New York, New Jersey, Louisiana, Pennsylvania, and Massachusetts; 2) Analysis of COVID-19 related infection and death rate across all the states in the US with race/ethnicity information on the affected subject when available.

Data source: Data sources in this study include, 1) publicly available data from USAfacts and the US Census Bureau for COVID-19 cases and county-level demographic data,<sup>9,10</sup> 2) COVID-19 data reported by each state on their department of health websites,<sup>9</sup> 3) State Population by Race/Ethnicity data,<sup>11,12</sup> and 4) mobility data extracted from Google.<sup>13</sup>

Variables used in this study include county-level information on total population, mobility, race, poverty level, median income, education, disability, rate of the insured population. Mobility data were extracted from Google as reported on April 05, 2020. The state-level data were extracted on April 16, 2020. The outcome variables include the rate of COVID-19 infection and all COVID-19 related death as provided by each state's department of health as of April 09, 2020. The infection rate is based on the reported results from all the laboratories testing samples in each county/state. The mortality data are reported by hospitals, nursing homes, and other health facilities. Table 1 summarizes the data elements used in this study. Only data provided by the states on their official websites were included in this study. Additionally, to compare the rate of COVID-19 cases and death, the population data for each ethnic/racial group affected were extracted from health department websites.

Statistical analysis: We summarized all continuous variables as mean  $\pm$  standard deviation or median with inter-quartile range [IQR], and categorical variables as percentages. Data from different sources were extracted and analyzed for outliers. Values not within three inter-quartiles were removed as part of the data pre-processing. Each continuous variable was centralized, and z-score transformed. Thus, the transformed variables passed the normality test and the correlation matrix was created. Bivariate, partial correlation, and regression were used to test hypotheses of association. The correlation coefficients between “Death Rate” or “Infection Rate” with independent variables were calculated by Pearson’s correlation (R corr package). Partial correlation was further evaluated by Pearson’s correlation (R ppcor package) to determine if the existing correlation was still valid after controlling the second independent variable. Bonferroni correction for multiple testing of controlling variables was considered to adjust the p-value of the correlation. Bivariate linear regression adjusted for “State” variables was utilized to test the association between “Death Rate” or “Infection Rate” with independent variables. The raw p-value was present in the forest plot. False discovery rate (FDR) corrections for multiple testing were calculated using the Benjamin and Hochberg procedure. Statistical analyses were performed using R version 3.6.2.<sup>14</sup> and IBM SPSS Statistics 26.<sup>15</sup>

## RESULTS

### **Population, mobility, and socioeconomic determinants.**

We extracted data from four different sources on 369 counties from seven states, including five states from the East Coast (Michigan, New York, New Jersey, Pennsylvania, and Massachusetts), one state from the West Coast (California), and one state from the South (Louisiana) with the total population of 102,178,117 (median: 73,447, IQR: 30,761-256,098). The information on race, income, education level, insurance, poverty, and disability including the description of abbreviated variables are summarized in Table 1, (Supplemental Table S1 includes additional summary statistics of the dataset).

Our data show a significant association among different socioeconomic determinants, such as poverty level, education, and income (See Table S2). In particular, counties with a higher percentage of people below the poverty level had a significantly lower percentage of the population with higher education (Pearson correlation: -0.52,  $p < 0.005$  for Bachelor's degree; Pearson correlation: -0.61,  $p < 0.005$  for High School), as well as a lower percentage of people insured, but a higher percentage of people on Medicaid (Pearson correlation: 0.77,  $p < 0.005$ ) or on disability (Pearson correlation: 0.41,  $p < 0.005$ ; See Table S2 for more details). Counties with a higher percentage of residents below the poverty level had a higher percentage of Blacks (Pearson correlation: 0.52,  $p < 0.005$  for men; Pearson correlation: 0.50,  $p < 0.005$  for women) and a lower percentage of non-Hispanic Whites (Pearson correlation: -0.30,  $p < 0.005$  for men; Pearson correlation: -0.33,  $p < 0.005$  for women).

### **Counties with a higher total population, more diverse demographics, higher education, and income level are at a higher risk of COVID-19 infection.**

The COVID-19 infection rate per one Million (mean:  $912.20 \pm 1,034.26$ ) ranged from 15.36 to 5,093.99 in different counties (Table 1 and S1). Figure 1 shows the map of Pennsylvania with total population for each county, rate of infection and death due to COVID-19 infection, as well as, median income in the counties and percentage of the population who are identified as non-Hispanic Whites. The map of the other six states is provided as Supplemental Figure S1-S6 for reference. The outliers were not removed in these figures.

The results of the bivariate linear regression (Figure 2, Table S3) estimate effect sizes (regression coefficients) of a number of variables contributed to COVID-19 infection when controlled for states in the model. Counties with a higher population (est. 0.34, 95% CI: 0.24, 0.44,  $q < 1.1E-08$ ), a higher median income (est. 0.36, 95% CI: 0.25, 0.48,  $q < 2.3E-08$ ) as well as a more diverse population (higher percentage of Hispanics, Asians, and Blacks) have a higher rate of infection. More specifically, a higher percentage of Asians (est. 0.32, 95% CI: 0.20, 0.44  $q < 6.3E-07$ , women;

est. 0.32, 95% CI: 0.20, 0.43,  $q < 4.5E-07$ , men), Blacks (est. 0.47, 95% CI: 0.32, 0.62,  $q < 2.3E-08$ , women; est. 0.35, 95% CI: 0.20, 0.51,  $q < 1.7E-05$ , men), as well as Hispanics (est. 0.49, 95% CI: 0.34, 0.64,  $q < 1.2E-08$ , women; est. 0.46, CI: 0.31, 0.62, ,  $q < 8.1E-08$ , men) are associated with a higher rate of infection while a higher percentage of non-Hispanic Whites (est. -0.41, 95% CI: -0.55, -0.26,  $q < 2.9E-07$ , women; est. -0.44, 95% CI: -0.58, -0.30,  $q < 4.2E-08$ , men) is associated with a lower rate of COVID-19. Change in grocery mobility (est. -0.24, 95% CI: -0.36, -0.13,  $q < 5.5E-05$ ), retail mobility (est. -0.26, 95% CI: -0.38, -0.14,  $q < 4.5E-05$ ) as well as work mobility (est. -0.31, 95% CI: -0.43, -0.20,  $q < 9.0E-07$ ) were associated with lower rate of infection. Another protective factor in terms of rate of infection for the counties analyzed was a higher percentage of disability (est. -0.159, 95% CI: -0.265, -0.053,  $q < 0.006$ ). We also analyzed the rate of infection for counties with respect to their percentage of uninsured and found no significant association other than among men (est. 0.181, 95% CI: 0.05, 0.313,  $q < 1.2E-02$ ) and non-Hispanic Whites (est. 0.251, 95% CI: 0.123, 0.380,  $q < 3.1E-04$ ). Furthermore, in our stepwise regression model, minorities specifically Black and Hispanic women, poverty, and level of education among non-Hispanic Whites, disability, the total county population, and level of mobility are predictors of the rate of COVID-19 infection (Table S4).

### **Counties with a smaller population, higher poverty levels, and higher disability have a higher rate of mortality.**

The COVID-19 related death (mean:  $4.13\% \pm 2.70\%$ , median: 3.40, IQR: 2.22-5.61) varied among different counties (Table 1 and S1). Figure 3 and Table S5 show the results of the bivariate regression analysis estimating the odds of mortality due to COVID-19 infection (model corrected for states). Protective factors for the counties are a higher percentage of Asians (est. -0.27, 95% CI: -0.41, -0.12,  $q < 0.003$ , women; est. -0.23, 95% CI: -0.37, -0.09,  $q < 0.009$ , men) and education level with a bachelor's degree or higher with an odds ratio ranging from -0.41 to -0.03 across the various ethnicities (see Figure 3). Other protective factors for counties include having a higher



percentage of people insured (strongest indicator being for non-Hispanic White people with an estimate of -0.48, 95% CI: -0.68, -0.28,  $q < 6.0E-05$ ), as well as median income (est. -0.27, 95% CI: -0.41, -0.12,  $q < 0.003$ ). The total population in the counties is also a major indicator (est. -0.33, 95% CI: -0.43, -0.20,  $q < 6.0E-05$ ) of lower COVID related death. We have also explored the association between total population and various confounding factors, such as mobility data when analyzing the death rate and found that the total population is still an important protective factor (see Table S6, Figure S7 and S8). Factors significantly associated with higher mortality in the counties analyzed include a higher percentage of people under the poverty level (for all the races analyzed in this study), a higher percentage of people on Medicaid (est. 0.17, 95% CI: 0.03, 0.30,  $q < 0.04$ ) as well as a higher rate of people with disability in the county (est. 0.27, 95% CI: 0.09, 0.45,  $q < 0.02$ ). Grocery mobility was also highly associated with mortality (est. 0.21, 95% CI: 0.02, 0.39,  $q < 0.06$ ).

To better understand the characteristics of counties with higher or lower death rates, we performed a comparative analysis using ANOVA and found that, similar to the above, counties with more population diversity, higher income and education, a lower rate of disability, and a higher rate of the insured population have a significantly lower than the median death rate. Table 2 and Table S7 summarizes the population characteristics when counties are compared with death rate lower and higher than the median (median death rate is 3.4% across the counties in the seven states, Table S1). Park and retail mobility changes are significantly different between the two groups. The average number of Asians (both man and woman), as well as Hispanics (both man and woman), is significantly higher ( $p < 0.05$ ) in group 1 (Death Rate  $\leq 3.4$ ). The counties with higher death rates have lower median income and higher poverty levels across all the races. The group with a lower death rate has also a higher rate of the insured population and a lower rate of disability. The percentage of Medicaid is significantly higher in the group with a higher death rate.

## **COVID-19 infection and mortality are higher among African Americans.**

We have also extracted data on all the states with respect to race distribution (see Table S8). As of April 16, 2020, we have observed that African Americans, as defined in the reports, have a higher rate of COVID-19 infection and a higher death rate (See Table 3). The number of African Americans infected by COVID-19 is 64,605 (1,981 cases per Million) with the number of deaths reaching 6,181 (211 deaths per Million), while the number of Whites, as defined in the reports, is 104,914 (658 cases per Million) infected and 9,806 (76 deaths per Million) dead leading to a disproportional percentage of African Americans infected ( $p < 0.0001$ ) by COVID-19 and dead ( $p < 0.0001$ ) as the result.

## **DISCUSSION**

Our analysis highlights that counties with a higher total population, more diverse demographics, higher education, and income level are at a higher risk of COVID-19 infection; however, counties with a smaller population, higher disability rates, and higher poverty levels have a higher rate of mortality. The conflicting results for counties' population could be related to the population density, easier access to the high quality of healthcare, and more experience managing the COVID-19 infection due to the higher number of patients. One can argue that counties with fewer residents have a higher rural population. Studies have shown that there are significant differences in the overall healthcare assessment of rural populations as compared to urban populations.<sup>16</sup> Our observation is also aligned with a recent analysis of health differences in 3,053 US counties, showing that rural areas are more likely to have poorer health outcomes.<sup>17</sup> The association of poverty and disability makes the conclusion of this study more complex and beyond the analysis of social determinants. By adding the interaction terms in the linear regression model (Death Rate  $\sim$  Poverty + Disability + Poverty:Disability) of Death Rate, we do not observe a significant interaction ( $p = 0.469$ ), suggesting these two variables could be independent in their contribution to the risk of mortality. Populations with a higher disability<sup>18</sup> and lower median income<sup>19</sup> might be

less mobile, have more comorbidities,<sup>20,21</sup> and also less likely benefit from timely high-quality care<sup>22</sup> and high-quality nutrition; all of these factors could be equally important to combating this pandemic.<sup>23,24</sup> Furthermore, our analysis of the preliminary data on mobility, given the recent social distancing guidelines, corroborate the impact of this intervention on lowering the infection rate and death.

Our findings highlight that race (especially Black) is a risk factor for the infection. To further our understanding of the impact of race, we performed an additional comparative analysis using ANOVA and found that counties with fewer than median non-Hispanic Whites (Group 1: percentage of non-Hispanic Whites  $\leq 39.7\%$ ) had a significantly lower total population ( $p < 5.2E-15$ ) than counties with more than median non-Hispanic Whites (Group 2: percentage of non-Hispanic Whites  $> 39.7\%$ ); however the rate of mortality is significantly higher ( $p < 0.003$ ) while the rate of infection is significantly lower ( $p < 4.4E-13$ ) in this group; Table S9 includes additional details. Finally, access to insurance was a protective factor in terms of mortality from COVID-19, but access to insurance did not significantly associate with the rate of infection. Comparison of counties with higher or lower than median death rates provided further evidence of the association of lower median income, and higher poverty levels across all the races with mortality. The counties with a higher death rate also had a higher percentage of people on Medicaid. The latter is expected since Medicaid is significantly associated with the rate of poverty (Pearson correlation: 0.769,  $p < 0.005$ ) as well as the rate of disability (Pearson correlation: 0.428,  $p < 0.005$ ). Descriptive statistics of data from all the states also corroborates that African Americans might be disproportionately affected by this pandemic as of April 16, 2020. This observation is consistent with the H1N1 pandemic, where studies have shown evidence of racial and ethnic disparities in the population affected in terms of exposure, severity, and mortality of the disease.<sup>7,8</sup> Finally historical data have taught us that minorities and people of color tend to be more affected by different diseases.<sup>25–28</sup>

Implications of the results from this study highlight the value of the targeted interventions, as different counties, even within the same state, may have different characteristics and different needs. Furthermore, as the association between COVID-19 related fatality and infection is different among different race and health status, it is important to further study the impact of the immune system and immune-boosting strategies in the at-risk population (such as people with certain disabilities or those residing in elderly community centers), as preventive measure along with other measures based on social distancing guidelines and the ability to work from home.

This is the first systematic study on the racial, health, and economic disparity, as well as education, mobility, and COVID-19 infection in the US with the available data from the most severely impacted states. Our study had several limitations; the data was not granular, and we had missingness, especially for smaller and less populated counties. Access to the infected patient information and mortality data was not possible, and only aggregated data were used. Furthermore, many states claimed difficulties in reporting racial/ethnic demographic data due to patients opting-out of providing their racial identification. The lack of clarity resulted in partially reported data for the death and case rate per million reported in this article, due to some states reporting on racial data for one, two, or all the racial variables specified in this study. The infection rate estimate may be underrepresented, as some individuals may have mild symptoms but lacked clinical validation of the infection. Finally, our in-depth analysis was based on only seven states, leading to conclusions that may not be generalizable to other regions.

## References:

1. BRANSWELL H, ANDREW JOSEPH. WHO declares the coronavirus outbreak a pandemic [Internet]. statnews. 2020;Available from: <https://www.statnews.com/2020/03/11/who-declares-the-coronavirus-outbreak-a-pandemic/>
2. Lake MA. What we know so far: COVID-19 current clinical knowledge and research. Clin Med 2020;20(2):124–7.
3. Shikha Garg, MD1,\*; Lindsay Kim, MD1,\*; Michael Whitaker, MPH1,2; Alissa O’Halloran, MSPH1; Charisse Cummings, MPH1,3; Rachel Holstein, MPH1,4; Mila Prill, MSPH1; Shua J. Chai, MD1; Pam D. Kirley, MPH5; Nisha B. Alden, MPH6; Breanna Kawasaki, MPH6; Kimber M. Hospitalization Rates and Characteristics of Patients Hospitalized with. 2020;69.
4. JHU. Coronavirus COVID-19 global cases by the center for systems science and engineering [Internet]. Johns Hopkins Univ. 2020;Available from: <https://coronavirus.jhu.edu/map.html>
5. Souch JM, Cossman JS. A Commentary on Rural-Urban Disparities in COVID-19 Testing Rates per 100,000 and Risk Factors. J Rural Health 2020;9:1–6.
6. Rothan HA, Byrareddy SN. The epidemiology and pathogenesis of coronavirus disease (COVID-19) outbreak. J Autoimmun 2020;(February):102433.
7. Quinn SC, Kumar S, Freimuth VS, Musa D, Casteneda-Angarita N, Kidwell K. Racial disparities in exposure, susceptibility, and access to health care in the US H1N1 influenza pandemic. Am J Public Health 2011;101(2):285–93.
8. Placzek H, Madoff L. Effect of race/ethnicity and socioeconomic status on pandemic H1N1-related outcomes in Massachusetts. Am J Public Health 2014;104(1).
9. Coronavirus Locations: COVID-19 Map by County and State. [Internet]. [cited 2020 Apr 12];Available from: <https://usafacts.org/visualizations/coronavirus-covid-19-spread-map/>
10. U.S. Census Bureau. United States Census. Presence of A Computer And Internet Subscription. [Internet]. [cited 2020 Apr 12];Available from: <https://data.census.gov/cedsci/table?q=Computer&tid=ACSST1Y2018.S2801&t=Telephone, Computer, and Internet Access>
11. State Population By Race, Ethnicity Data [Internet]. [cited 2020 Apr 12];Available from: <https://www.governing.com/gov-data/census/state-minority-population-data-estimates.html>
12. Black Population by State 2020 [Internet]. [cited 2020 Apr 14];Available from: <https://worldpopulationreview.com/states/black-population-by-state/>
13. Google. See how your community is moving around differently due to COVID-19 [Internet]. [cited 2020 Apr 12];Available from: <https://www.google.com/covid19/mobility/>
14. The R Foundation. The R Project for Statistical Computing. <http://www.R-project.org/> 2018;1–12.
15. IBM. Downloading IBM SPSS Statistics 25 [Internet]. Ibm. 2020 [cited 2020 Apr 20];Available from: <https://www.ibm.com/support/pages/downloading-ibm-spss-statistics-25>
16. Spasojevic N, Vasilj I, Hrabac B, Celik D. Rural - Urban Differences in Health Care Quality Assessment. Mater Socio Medica 2015;27(6):409.
17. Anderson TJ, Saman DM, Lipsky MS, Lutfiyya MN. A cross-sectional study on health differences between rural and non-rural U.S. counties using the County Health Rankings. BMC Health Serv Res 2015;15(1):1–8.
18. Montez JK, Hayward MD, Wolf DA. Do U.S. states’ socioeconomic and policy contexts shape adult disability? Soc Sci Med [Internet] 2017;178:115–26. Available from: <https://linkinghub.elsevier.com/retrieve/pii/S0277953617301016>
19. Meyer BD, Mok WKC. Disability, earnings, income and consumption. J Public Econ [Internet] 2019;171:51–69. Available from: <https://linkinghub.elsevier.com/retrieve/pii/S0047272718301245>
20. Reichard A, Stolze H, Fox MH. Health disparities among adults with physical disabilities or cognitive limitations compared to individuals with no disabilities in the United States. Disabil Health J 2011;4(2):59–67.
21. Haverkamp SM, Scandlin D, Roth M. Health disparities among adults with developmental disabilities, adults with other disabilities, and adults not reporting disability in North Carolina. Public Health Rep 2004;119(4):418–26.

22. Swanson ME, Wall S, Kisker E, Peterson C. Health disparities in low-income families with infants and toddlers: Needs and challenges related to disability. *J Child Heal Care* 2011;15(1):25–38.
23. Cena, Hellas and Chieppe M. Coronavirus disease (COVID-19 - SARS-CoV-2) and nutrition, is the Italian infection suggesting a connection? [Internet]. Available from: <https://www.frontiersin.org/articles/10.3389/fimmu.2020.00944/abstract>
24. Sharma V, Sharma V, Khan A, et al. Malnutrition, Health and the Role of Machine Learning in Clinical Setting. *Front Nutr* [Internet] 2020;7(April):1–9. Available from: <https://www.frontiersin.org/article/10.3389/fnut.2020.00044/full>
25. Crouse Quinn S, Jamison AM, Freimuth VS, An J, Hancock GR. Determinants of influenza vaccination among high-risk Black and White adults. *Vaccine* 2017;35(51):7154–9.
26. Anandappa M, Adjei Boakye E, Li W, Zeng W, Rebmann T, Chang JJ. Racial disparities in vaccination for seasonal influenza in early childhood. *Public Health* 2018;158:1–8.
27. Yoo BK, Hasebe T, Szilagyi PG. Decomposing racial/ethnic disparities in influenza vaccination among the elderly. *Vaccine* 2015;33(26):2997–3002.
28. Canedo JR, Miller ST, Schlundt D, Fadden MK SM. Racial/Ethnic Disparities in Diabetes Quality of Care: The Role of Healthcare Access and Socioeconomic Status. *J Racial Ethn Heal Disparities* 2018;

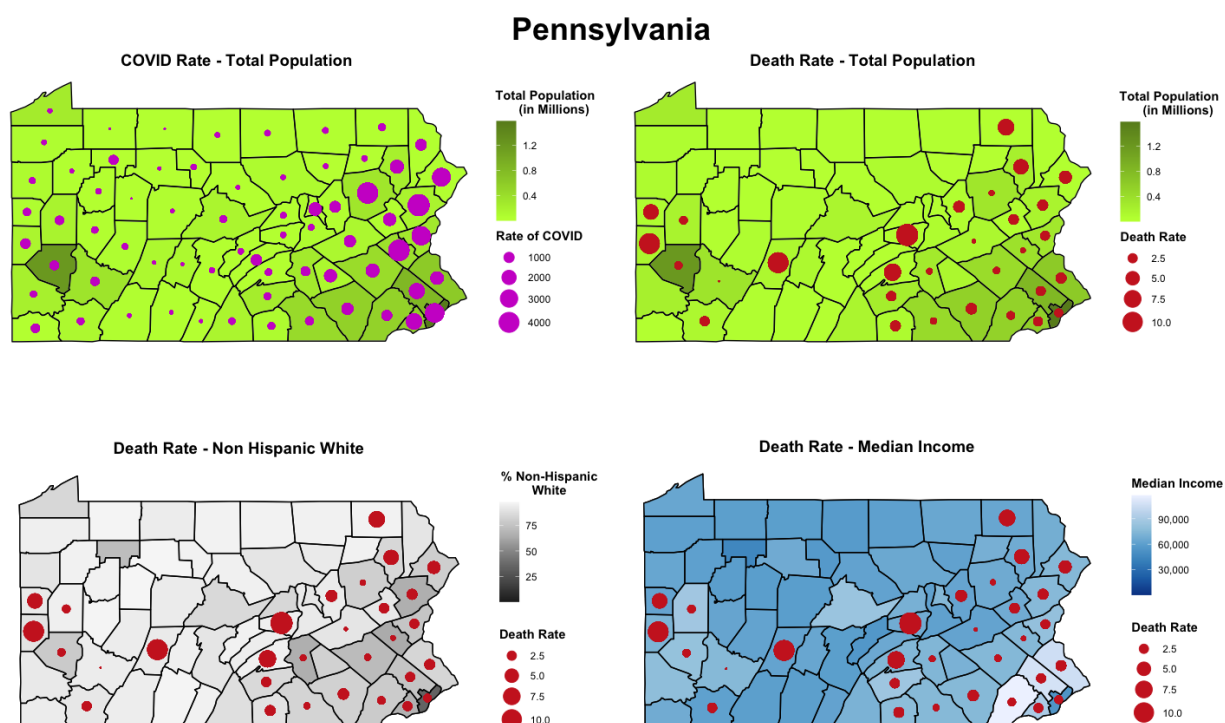

**Figure 1.** Population count, non-Hispanic White, and Median Income and the rate of COVID-19 and related death in the counties of the state of Pennsylvania, as of April 9<sup>th</sup>, 2020.



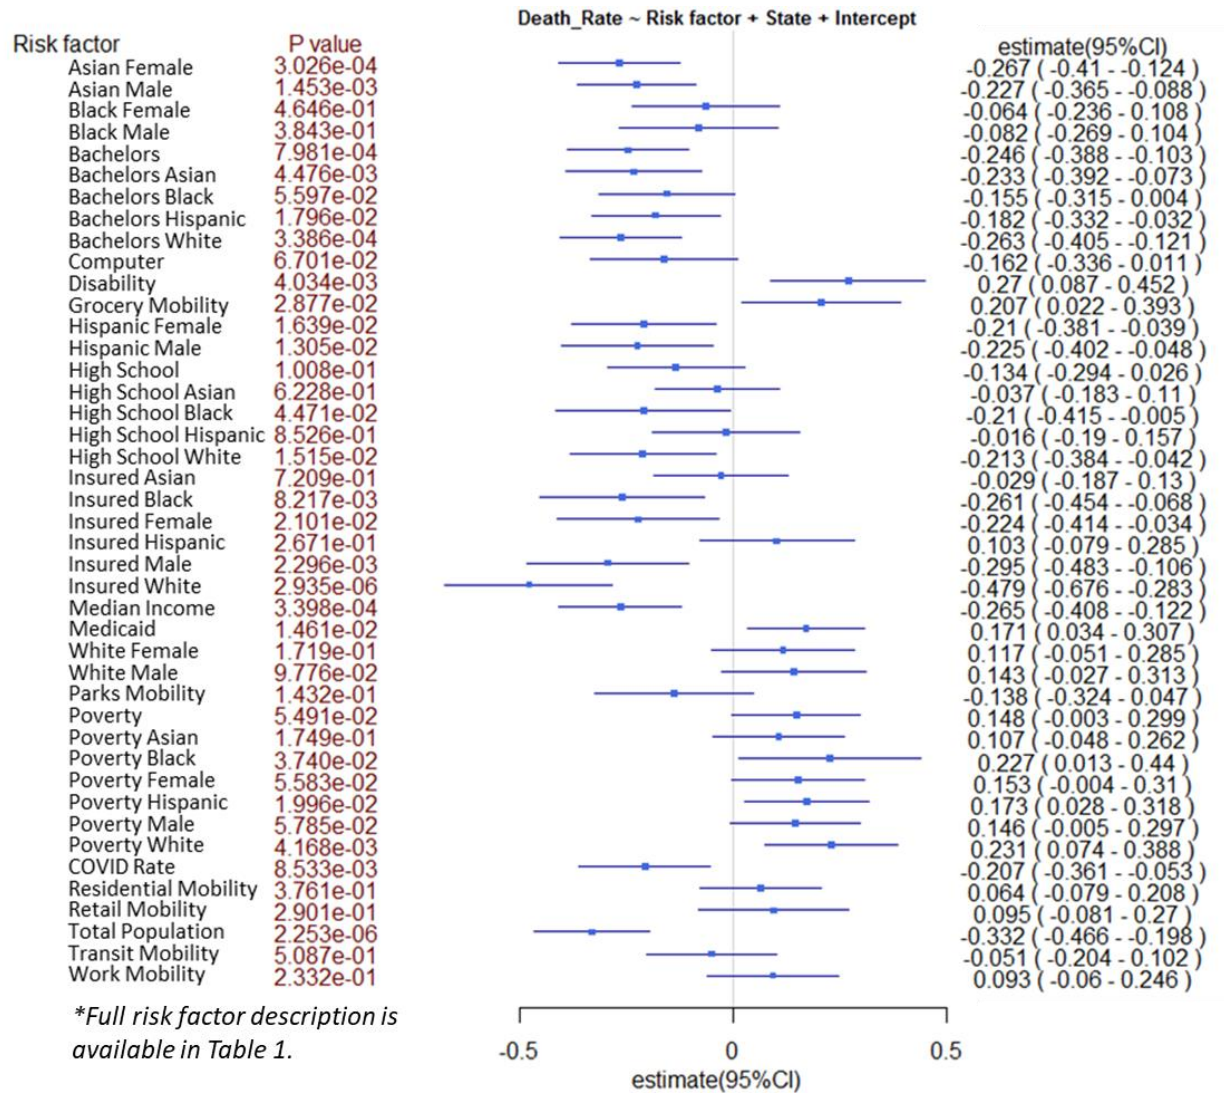

**Figure 2.** Bivariate analysis of risk factors for infection by COVID-19.



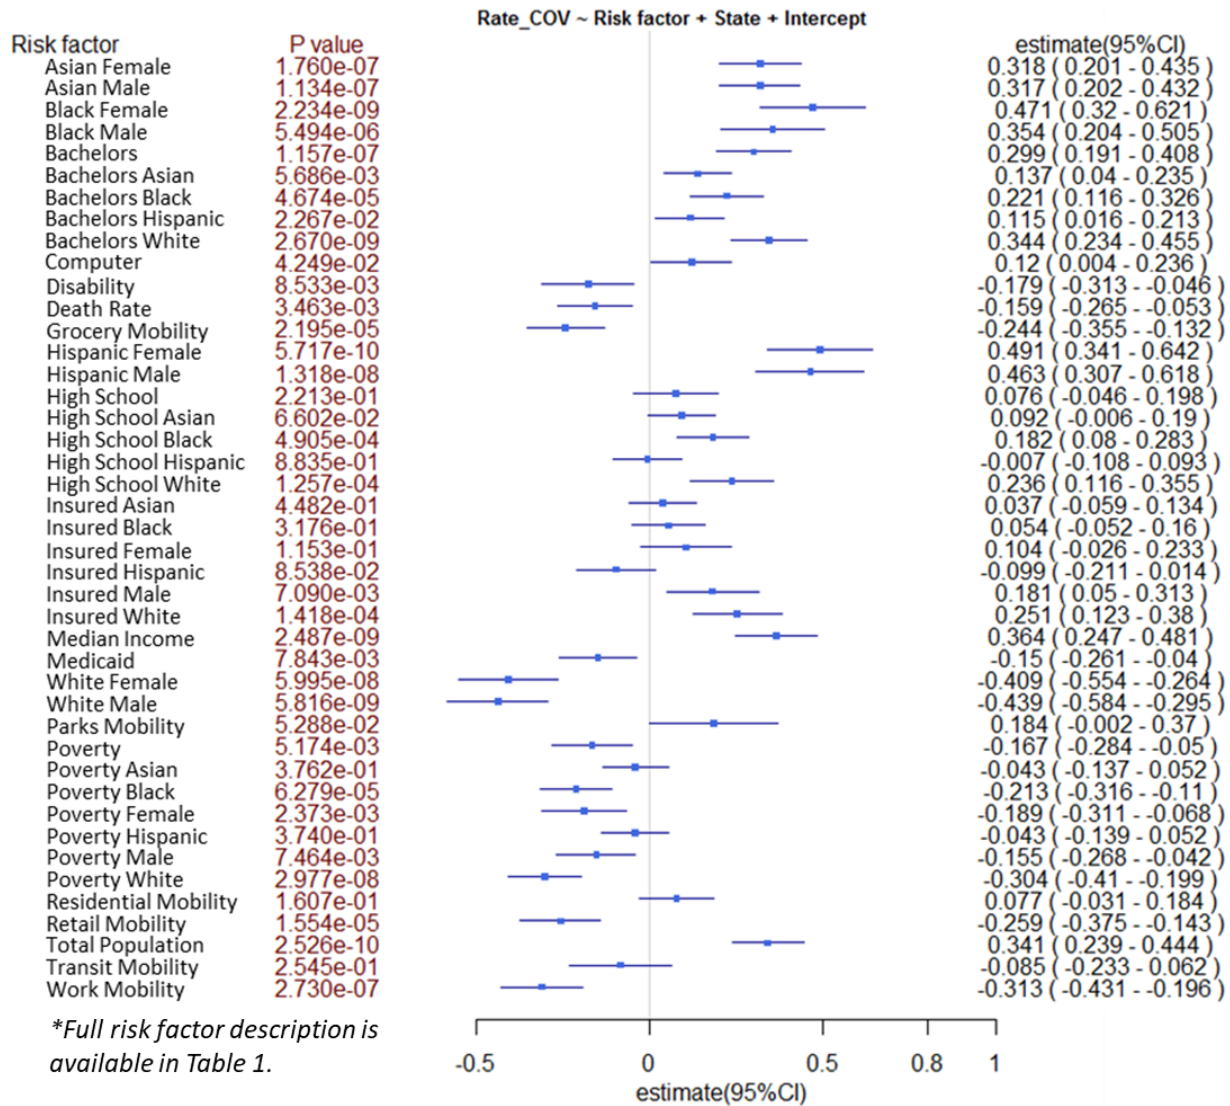

**Figure 3.** Bivariate analysis of risk factors for mortality due to COVID-19.

**Table 1.** Data elements, descriptions, reference to the source of data, and base statistics used in this study.

| Data Elements             | Description, source ref.                                                                                                                                         | N (Valid) | N (Missing/ outlier) | Mean    | Minimum | Maximum |
|---------------------------|------------------------------------------------------------------------------------------------------------------------------------------------------------------|-----------|----------------------|---------|---------|---------|
| <b>Population</b>         | Total Population <sup>29</sup>                                                                                                                                   | 346       | 23 (0/23)            | 155,080 | 1129    | 918,702 |
| <b>Rate COVID</b>         | Rate of COVID in one In Million <sup>9</sup>                                                                                                                     | 325       | 44 (38/6)            | 912.20  | 15.36   | 5093.99 |
| <b>Death Rate</b>         | Rate of COVID related Death (percent) <sup>9</sup>                                                                                                               | 218       | 151(139/12)          | 4.13    | 0.31    | 15.79   |
| <b>Change in Mobility</b> |                                                                                                                                                                  |           |                      |         |         |         |
| <b>Retail Mobility</b>    | GOOGLE RETAIL RECREATION MOBILITY <sup>13</sup>                                                                                                                  | 353       | 16 (14/2)            | -0.47   | -1.00   | 0.01    |
| <b>Grocery Mobility</b>   | GOOGLE GROCERY PHARMACY MOBILITY <sup>13</sup>                                                                                                                   | 354       | 15 (15/0)            | -0.16   | -0.67   | 0.31    |
| <b>Parks Mobility</b>     | GOOGLE PARKS MOBILITY <sup>13</sup>                                                                                                                              | 201       | 168 (168/0)          | 0.05    | -0.87   | 1.80    |
| <b>Transit Mobility</b>   | GOOGLE TRANSIT MOBILITY <sup>13</sup>                                                                                                                            | 198       | 171 (169/2)          | -0.48   | -0.88   | 0.09    |
| <b>Work Mobility</b>      | GOOGLE WORKPLACE MOBILITY <sup>13</sup>                                                                                                                          | 356       | 13 (11/2)            | -0.37   | -0.60   | -0.15   |
| <b>Resident Mobility</b>  | GOOGLE RESIDENTIAL MOBILITY <sup>13</sup>                                                                                                                        | 282       | 87 (87/0)            | 0.14    | -0.02   | 0.32    |
| <b>Computer</b>           | Percent Has computer with broadband Internet subscription <sup>10</sup>                                                                                          | 368       | 1 (0/1)              | 28.82   | 13.88   | 38.50   |
| <b>Race</b>               |                                                                                                                                                                  |           |                      |         |         |         |
| <b>Black Male</b>         | Percent BA (Black Alone) MALE <sup>29</sup>                                                                                                                      | 359       | 10 (0/10)            | 4.66    | 0.00    | 23.04   |
| <b>Black Female</b>       | Percent BA (Black Alone) FEMALE <sup>29</sup>                                                                                                                    | 359       | 10 (0/10)            | 4.24    | 0.09    | 23.98   |
| <b>Asian Male</b>         | Percent AA (Asian Alone) MALE <sup>29</sup>                                                                                                                      | 349       | 20 (0/20)            | 1.00    | 0.00    | 5.71    |
| <b>Asian Female</b>       | Percent AA (Asian Alone) FEMALE <sup>29</sup>                                                                                                                    | 346       | 23 (0/23)            | 1.06    | 0.04    | 5.60    |
| <b>White Male</b>         | Percent NHWA (non-Hispanic White Alone) MALE <sup>29</sup>                                                                                                       | 369       | 0 (0/0)              | 37.07   | 4.48    | 50.26   |
| <b>White Female</b>       | Percent NHWA (non-Hispanic White Alone) FEMALE <sup>29</sup>                                                                                                     | 369       | 0 (0/0)              | 37.56   | 4.65    | 49.00   |
| <b>Hispanic Male</b>      | Percent H (Hispanic) MALE <sup>29</sup>                                                                                                                          | 348       | 21 (0/21)            | 3.83    | 0.40    | 17.75   |
| <b>Hispanic Female</b>    | Percent H (Hispanic) FEMALE <sup>29</sup>                                                                                                                        | 348       | 21 (0/21)            | 3.51    | 0.39    | 17.09   |
| <b>Income</b>             |                                                                                                                                                                  |           |                      |         |         |         |
| <b>Median Income</b>      | Median Family income; past 12 months 2018 <sup>29</sup>                                                                                                          | 364       | 5 (0/5)              | 68969   | 30717   | 131554  |
| <b>Poverty</b>            | Percent below poverty level Population for whom poverty status is determined <sup>29</sup>                                                                       | 366       | 3 (0/3)              | 14.89   | 4.60    | 33.50   |
| <b>Poverty Male</b>       | Percent below poverty level Population for whom poverty status is determined SEX Male <sup>29</sup>                                                              | 367       | 2 (0/2)              | 13.64   | 4.20    | 33.20   |
| <b>Poverty Female</b>     | Percent below poverty level Population for whom poverty status is determined SEX Female <sup>29</sup>                                                            | 367       | 2 (0/2)              | 16.20   | 4.80    | 38.50   |
| <b>Poverty Black</b>      | Percent below poverty level Population for whom poverty status is determined RACE AND HISPANIC OR LATINO ORIGIN Black or African American alone <sup>29</sup>    | 368       | 1 (1/0)              | 32.30   | 0.60    | 100.00  |
| <b>Poverty Asian</b>      | Percent below poverty level Population for whom poverty status is determined RACE AND HISPANIC OR LATINO ORIGIN Asian alone <sup>29</sup>                        | 359       | 10 (5/5)             | 14.71   | 0.00    | 70.10   |
| <b>Poverty Hispanic</b>   | Percent bel poverty Pop for whom poverty is determined RACE AND HISPANIC OR LATINO ORIGIN Hispanic or Latino origin of any race <sup>29</sup>                    | 365       | 4 (0/4)              | 24.00   | 0.00    | 68.70   |
| <b>Poverty White</b>      | Percent below poverty level Population for whom poverty status is determined RACE AND HISPANIC OR LATINO ORIGIN White alone not Hispanic or Latino <sup>29</sup> | 369       | 0 (0/0)              | 11.82   | 3.20    | 26.40   |

| Education                   |                                                                                                                                                      |     |           |       |       |        |
|-----------------------------|------------------------------------------------------------------------------------------------------------------------------------------------------|-----|-----------|-------|-------|--------|
| <b>High School</b>          | Percent below poverty level Population for whom poverty status is determined RACE AND HISPANIC OR LATINO ORIGIN White alone <sup>29</sup>            | 367 | 2 (0/2)   | 87.67 | 69.40 | 96.10  |
| <b>Bachelors</b>            | Percent Population 25 years and over Bachelors degree or higher <sup>29</sup>                                                                        | 369 | 0 (0/0)   | 24.64 | 7.40  | 60.80  |
| <b>High School White</b>    | Percent RACE AND HISPANIC OR LATINO ORIGIN BY EDUCATIONAL ATTAINMENT White alone not Hispanic or Latino High school graduate or higher <sup>29</sup> | 369 | 0 (0/0)   | 90.78 | 76.20 | 98.30  |
| <b>Bachelors White</b>      | Percent RACE AND HISPANIC OR LATINO ORIGIN BY EDUCATIONAL ATTAINMENT White alone not Hispanic or Latino Bachelors degree or higher <sup>29</sup>     | 368 | 1 (0/1)   | 27.04 | 10.70 | 76.40  |
| <b>High School Black</b>    | Percent RACE AND HISPANIC OR LATINO ORIGIN BY EDUCATIONAL ATTAINMENT Black alone High school graduate or higher <sup>29</sup>                        | 366 | 3 (0/3)   | 81.30 | 40.80 | 100.00 |
| <b>Bachelors Black</b>      | Percent RACE AND HISPANIC OR LATINO ORIGIN BY EDUCATIONAL ATTAINMENT Black alone Bachelors degree or higher <sup>29</sup>                            | 369 | 0 (0/0)   | 16.21 | 0.00  | 69.60  |
| <b>High School Asian</b>    | Percent RACE AND HISPANIC OR LATINO ORIGIN BY EDUCATIONAL ATTAINMENT Asian alone High school graduate or higher <sup>29</sup>                        | 356 | 13 (6/7)  | 85.48 | 52.10 | 100.00 |
| <b>Bachelors Asian</b>      | Percent RACE AND HISPANIC OR LATINO ORIGIN BY EDUCATIONAL ATTAINMENT Asian alone Bachelors degree or higher <sup>29</sup>                            | 363 | 6 (6/0)   | 45.35 | 0.00  | 100.00 |
| <b>High School Hispanic</b> | Percent RACE AND HISPANIC OR LATINO ORIGIN BY EDUCATIONAL ATTAINMENT Hispanic or Latino Origin High school graduate or higher <sup>29</sup>          | 368 | 1 (1/0)   | 72.91 | 22.20 | 100.00 |
| <b>Bachelors Hispanic</b>   | Percent RACE AND HISPANIC OR LATINO ORIGIN BY EDUCATIONAL ATTAINMENT Hispanic or Latino Origin Bachelors degree or higher <sup>29</sup>              | 368 | 1 (1/0)   | 15.36 | 0.00  | 50.30  |
| Disability / Insurance      |                                                                                                                                                      |     |           |       |       |        |
| <b>Disability</b>           | Percent with a disability Subject Total civilian noninstitutionalized population <sup>29</sup>                                                       | 369 | 0 (0/0)   | 14.99 | 6.50  | 28.50  |
| <b>Insured Male</b>         | Percent Insured Civilian noninstitutionalized population SEX Male <sup>29</sup>                                                                      | 368 | 1 (0/1)   | 91.53 | 80.50 | 97.50  |
| <b>Insured Female</b>       | Percent Insured Civilian noninstitutionalized population SEX Female <sup>29</sup>                                                                    | 367 | 2 (0/2)   | 93.69 | 81.10 | 98.40  |
| <b>Insured Black</b>        | Percent Insured Civilian noninstitutionalized population RACE AND HISPANIC OR LATINO ORIGIN Black or African American alone <sup>29</sup>            | 365 | 4 (1/3)   | 91.64 | 71.40 | 100.00 |
| <b>Insured Asian</b>        | Percent Insured Civilian noninstitutionalized population RACE AND HISPANIC OR LATINO ORIGIN Asian alone <sup>29</sup>                                | 347 | 22 (5/17) | 92.45 | 67.00 | 100.00 |
| <b>Insured Hispanic</b>     | Percent Insured Civilian noninstitutionalized population RACE AND HISPANIC OR LATINO ORIGIN Hispanic or Latino of any race <sup>29</sup>             | 364 | 5 (0/5)   | 86.58 | 55.50 | 100.00 |
| <b>Insured White</b>        | Percent Insured Civilian noninstitutionalized population RACE AND HISPANIC OR LATINO ORIGIN White alone not Hispanic or Latino <sup>29</sup>         | 368 | 1 (0/1)   | 93.90 | 85.10 | 98.40  |
| <b>Medicaid</b>             | Percent Public Coverage Medicaid means tested public coverage alone or in combination <sup>29</sup>                                                  | 369 | 0 (0/0)   | 23.23 | 6.90  | 48.40  |

**Table 2.** ANOVA comparing counties with higher and lower than the median death rate.

|                        | Covariates           | Total (N: 218)<br>Mean Std. Deviation |           | Group 1:<br>DeathRate ≤ 3.4 (N: 109)<br>Mean Std. Deviation |           | Group 2:<br>DeathRate >3.4 (N:109)<br>Mean Std. Deviation |           | ANOVA -<br>Between Groups<br>Sig.                                                     |          |
|------------------------|----------------------|---------------------------------------|-----------|-------------------------------------------------------------|-----------|-----------------------------------------------------------|-----------|---------------------------------------------------------------------------------------|----------|
| Density                | Population**         | 237239.53                             | 233671.21 | 319585.59                                                   | 245715.54 | 159010.78                                                 | 192309.74 |    | 8.25E-07 |
|                        | Rate of COVID**      | 1272.57                               | 1142.34   | 1433.01                                                     | 1166.21   | 1099.91                                                   | 1096.27   |    | 4.37E-02 |
| Change in mobility     | Retail Mobility**    | -0.49                                 | 0.13      | -0.51                                                       | 0.12      | -0.47                                                     | 0.14      |    | 2.86E-02 |
|                        | Grocery Mobility     | -0.18                                 | 0.13      | -0.19                                                       | 0.14      | -0.17                                                     | 0.13      |    | 1.37E-01 |
|                        | Parks Mobility**     | 0.13                                  | 0.60      | 0.21                                                        | 0.60      | 0.00                                                      | 0.59      |    | 3.65E-02 |
|                        | Transit Mobility     | -0.50                                 | 0.16      | -0.49                                                       | 0.17      | -0.50                                                     | 0.16      |    | 7.98E-01 |
|                        | Work Mobility        | -0.38                                 | 0.08      | -0.39                                                       | 0.07      | -0.38                                                     | 0.08      |    | 1.13E-01 |
|                        | Resident Mobility    | 0.15                                  | 0.05      | 0.14                                                        | 0.04      | 0.15                                                      | 0.06      |    | 6.62E-02 |
| PC                     | Computer**           | 29.17                                 | 3.64      | 29.89                                                       | 3.06      | 28.46                                                     | 4.03      |    | 3.39E-03 |
| Race                   | Black Male           | 5.68                                  | 5.42      | 5.24                                                        | 4.52      | 6.14                                                      | 6.21      |    | 2.29E-01 |
|                        | Black Female         | 5.76                                  | 6.01      | 5.34                                                        | 4.98      | 6.19                                                      | 6.91      |    | 3.03E-01 |
|                        | Asian Male**         | 1.37                                  | 1.33      | 1.69                                                        | 1.36      | 1.06                                                      | 1.23      |    | 9.25E-04 |
|                        | Asian Female**       | 1.43                                  | 1.31      | 1.76                                                        | 1.35      | 1.12                                                      | 1.21      |    | 5.98E-04 |
|                        | White Male           | 33.99                                 | 10.08     | 33.55                                                       | 9.38      | 34.42                                                     | 10.76     |    | 5.28E-01 |
|                        | White Female         | 35.00                                 | 10.40     | 34.84                                                       | 9.96      | 35.16                                                     | 10.87     |    | 8.18E-01 |
|                        | Hispanic Male**      | 4.68                                  | 4.29      | 5.43                                                        | 4.53      | 3.92                                                      | 3.92      |    | 1.24E-02 |
|                        | Hispanic Female**    | 4.48                                  | 4.27      | 5.22                                                        | 4.48      | 3.74                                                      | 3.94      |   | 1.32E-02 |
| Income                 | Median Income**      | 74817.20                              | 18918.79  | 81488.08                                                    | 19201.41  | 68083.38                                                  | 16103.69  |  | 1.00E-07 |
|                        | Poverty**            | 14.35                                 | 5.43      | 12.87                                                       | 4.72      | 15.83                                                     | 5.70      |  | 4.21E-05 |
|                        | Poverty Male**       | 13.03                                 | 5.08      | 11.66                                                       | 4.36      | 14.40                                                     | 5.40      |  | 5.40E-05 |
|                        | Poverty Female**     | 15.60                                 | 5.82      | 14.01                                                       | 5.12      | 17.19                                                     | 6.07      |  | 4.18E-05 |
|                        | Poverty Black**      | 27.42                                 | 11.81     | 24.46                                                       | 9.80      | 30.38                                                     | 12.91     |  | 1.76E-04 |
|                        | Poverty Asian**      | 14.15                                 | 11.29     | 12.65                                                       | 9.93      | 15.65                                                     | 12.37     |  | 4.95E-02 |
|                        | Poverty Hispanic**   | 23.55                                 | 10.23     | 21.74                                                       | 7.60      | 25.37                                                     | 12.08     |  | 8.49E-03 |
|                        | Poverty White**      | 10.51                                 | 3.92      | 9.42                                                        | 3.38      | 11.61                                                     | 4.13      |  | 2.69E-05 |
| Education              | High School**        | 87.70                                 | 5.44      | 88.50                                                       | 4.83      | 86.90                                                     | 5.90      |  | 2.92E-02 |
|                        | Bachelors**          | 28.06                                 | 11.32     | 31.31                                                       | 10.97     | 24.80                                                     | 10.75     |  | 1.53E-05 |
|                        | High School White**  | 91.60                                 | 3.95      | 92.43                                                       | 3.62      | 90.77                                                     | 4.10      |  | 1.76E-03 |
|                        | Bachelors White**    | 31.31                                 | 13.13     | 34.96                                                       | 13.01     | 27.64                                                     | 12.24     |  | 2.95E-05 |
|                        | High School Black**  | 83.24                                 | 7.47      | 85.02                                                       | 6.24      | 81.46                                                     | 8.17      |  | 3.60E-04 |
|                        | Bachelors Black**    | 18.98                                 | 9.90      | 20.75                                                       | 9.19      | 17.21                                                     | 10.29     |  | 8.00E-03 |
|                        | High School Asian**  | 85.36                                 | 9.37      | 86.68                                                       | 7.79      | 83.98                                                     | 10.64     |  | 3.45E-02 |
|                        | Bachelors Asian**    | 47.44                                 | 18.44     | 52.27                                                       | 14.74     | 42.61                                                     | 20.46     |  | 8.62E-05 |
|                        | High School Hispanic | 72.57                                 | 10.05     | 72.79                                                       | 8.54      | 72.35                                                     | 11.39     |  | 7.46E-01 |
|                        | Bachelors Hispanic** | 16.82                                 | 8.00      | 18.22                                                       | 7.78      | 15.41                                                     | 8.00      |  | 9.39E-03 |
| Disability / Insurance | Disability**         | 13.59                                 | 3.06      | 12.92                                                       | 2.87      | 14.26                                                     | 3.10      |  | 1.06E-03 |
|                        | Insured Male**       | 91.75                                 | 3.15      | 92.45                                                       | 3.03      | 91.05                                                     | 3.13      |  | 9.59E-04 |
|                        | Insured Female**     | 93.87                                 | 2.73      | 94.39                                                       | 2.57      | 93.35                                                     | 2.80      |  | 5.14E-03 |
|                        | Insured Black**      | 91.42                                 | 4.24      | 92.16                                                       | 3.03      | 90.69                                                     | 5.10      |  | 1.03E-02 |
|                        | Insured Asian        | 92.14                                 | 5.51      | 92.68                                                       | 4.23      | 91.57                                                     | 6.57      |  | 1.45E-01 |
|                        | Insured Hispanic     | 85.66                                 | 8.26      | 86.26                                                       | 7.25      | 85.06                                                     | 9.15      |  | 2.83E-01 |
|                        | Insured White**      | 94.50                                 | 2.43      | 95.21                                                       | 2.09      | 93.80                                                     | 2.55      |  | 1.33E-05 |
|                        | Medicaid**           | 22.44                                 | 7.01      | 20.88                                                       | 6.36      | 24.00                                                     | 7.30      |  | 9.23E-04 |

Full risk factor description is available in Table 1. \*\* denotes statistically significant.

**Table 3.** Rate of COVID-19 positive cases and related deaths with respect to race in the United States as of April 16, 2020.

| <b>Race</b>             | <b>Infection Rate (per Million)</b> | <b>Death Rate (per Million)</b> |
|-------------------------|-------------------------------------|---------------------------------|
| <b>African American</b> | 1,981                               | 211                             |
| <b>White</b>            | 658                                 | 76                              |
| <b>Latino</b>           | 947                                 | 82                              |
| <b>Asian</b>            | 390                                 | 52                              |
